1  
2  
3  
4  
5  
6  
7  
8  
9  
10  
11  
12  
13  
14  
15  
16  
17  
18  
19  
20  
21  
22

**South Asia’s unprotected poor: a systematic review of why social protection programs fail to reach their potential**

Warda Javed<sup>a</sup> & Zubia Mumtaz<sup>a,b</sup>

<sup>a</sup>*School of Public Health, University of Alberta, 3-309 Edmonton Clinic Health Academy, 11405 – 87 Ave, Edmonton, AB T6G 1C9, Canada,*

<sup>b</sup>***Corresponding Author:*** [zubia.mumtaz@ualberta.ca](mailto:zubia.mumtaz@ualberta.ca), +001.780.9049038

23 **Abstract**

24 The incongruity between South Asia’s economic growth and extreme poverty has led to a  
25 growing interest in social protection and the subsequent implementation of anti-poverty  
26 programs. These work to promote inclusive growth and ensure that the poor do not get left  
27 behind. However, many programs have systematically failed to achieve their full potential in  
28 reaching the poorest of the poor. We reviewed the literature to understand the determinants  
29 behind this inequity in South Asia.

30 A search of four databases, EconLit, Global Health Database, MEDLINE, SocINDEX,  
31 supplemented by citation tracking and an external search, yielded 42 papers evaluating 23 social  
32 protection programs. All articles were assessed for quality using the GRADE and GRADE  
33 CERQual criteria. Data were analyzed using Thomas & Harding’s thematic synthesis approach  
34 to generate new higher-order interpretations.

35 Our analysis identified five themes underscoring program processes that stop resources  
36 from reaching the poor. These include: (1) structurally flawed program theories that overlook the  
37 complexities of poverty and are instead rooted in simplistic cause-and-effect approaches  
38 overestimating the poor’s gain from participation; (2) elite capture of program resources through  
39 the direct appropriation of benefits, their powerful positioning in program implementation, and  
40 their ability to dictate the poor’s accessibility through relationships of patronage and withholding  
41 of information; (3) insufficient targeting strategies to reach the poorest and a subsequent  
42 redirection of resources toward the rich; (4) program designs that overlook gender-based  
43 restrictions, hidden costs, the poor’s lack of legal documentation, and their physical and social  
44 exclusion; (5) some of the poorest households actively choosing self-exclusion from social

45 protection due to a desire to maintain dignity, a lack of capital, and a perception of programs as  
46 substandard.

47         The review highlights the disconnect between social protection program designs and the  
48 ground realities of their ‘ideal’ beneficiaries: the poorest of the poor. We propose the persistence  
49 of this well-documented disconnect may stem from three sources. First, there is an unclear  
50 understanding of who the poor are in South Asia, with definitions overlooking the historical  
51 influence of the caste system. Western perceptions of poverty continue to dominate the  
52 discourse. The second challenge is effective engagement and co-production of knowledge with  
53 the poor. Lastly, despite encouragement of international collaboration, fast-paced funding calls  
54 do not allocate sufficient time to build relationships with the poor primary stakeholders. We  
55 suggest the possibility that maintenance of this disconnect is intentional, reflecting a broader  
56 power dynamic in which the global and local elite dictate the lives of the poor based on  
57 geopolitical interests and national priorities.

58  
59

60

61

62

63

64

65

66

67

68

## 69 **Introduction**

70 Over the past few decades, substantial economic growth has been achieved globally, most  
71 notably in low and middle-income countries [1,2]. Before the COVID-19 pandemic, the growth  
72 was largely accompanied by a concomitant decline in poverty trends [3]. That said, poverty  
73 reduction was lower than expected, considering the rate of fiscal expansion. A failure of the  
74 trickle-down theory, a lack of pro-poor investment in the social sector, and globalization further  
75 left the poor behind and amplified the inequities [1,2,4,5].

76 This failure to reduce poverty led to a growing interest in social protection, a broad term  
77 denoting programs and policies that “[tackle] poverty and vulnerability while strengthening  
78 inclusive social development and equitable economic growth.” [6] Usually an *ex-post* response  
79 to poverty, the programs intend to establish inclusive growth via promotive, protective [7],  
80 preventive [8], and transformative anti-poverty interventions [9]. They include the instruments of  
81 social assistance/social safety nets, social care, social insurance, and labour market policies [10].  
82 Through short-term responses to shocks and long-term sustainable and systemic interventions,  
83 these strategies aim to support an individual’s movement out of poverty or prevent it altogether  
84 [11].

85 The demand for social protection has heightened due to the multiple overlapping crises of  
86 climate change, deglobalization, and, most recently, COVID-19. The pandemic alone has added  
87 124 million individuals [12] to the 648 million [3] already living in extreme poverty, particularly  
88 in the world’s resource-poor regions. Social assistance has become the primary tool to cushion  
89 these impacts, forming 78% of state-implemented COVID-19 relief [13]. According to recent  
90 data, over 1,700 new social protection initiatives were introduced to address the pandemic alone  
91 [12].

92           However, emerging evidence suggests social protection programs fail to realize their  
93 potential in targeting the poorest of the poor. A 2022 United Nations report [14] urges that “little  
94 attention has been paid to the countless individuals that are falling through the cracks of [social  
95 protection].” Kidd & Athias [15] echo these apprehensions in their evaluation of 38 programs  
96 across 23 low- and middle-income countries. They show that targeted initiatives did not reach  
97 over half the poorest quintile of their anticipated beneficiaries. The Atlas of Social Protection  
98 Indicators of Resilience and Equity dataset from 2014-2019 paralleled these findings, showing  
99 that social assistance programs in low-income countries covered only 17% of the poorest  
100 households [16].

101           It is particularly important to focus on South Asia, a region home to 21% of the world’s  
102 poor [3]. It is plagued with high national debts and inflation [17], corruption, and conflict [18].  
103 South Asia is also on the frontline of the impacts of climate change [19]. Despite the economic  
104 progress of some countries, notably India and Bangladesh [20], it remains a region characterized  
105 by deeply rooted systemic inequities that subordinate and marginalize some subgroups  
106 [21,22,23]. This marginalization is structured within historical caste-based social hierarchies,  
107 which are reinforced by a tangible reality in which the poor have limited rights to engage in the  
108 economic, social, and political spheres of their society [24]. An example of this exclusion is the  
109 failure of Pakistan’s Benazir Income Support Programme and India’s Mahatma Gandhi National  
110 Rural Employment Guarantee Scheme to reach, respectively, 79% and 68% of the poorest  
111 quintile of their target populations [15]. Only 25% of Pakistan’s poorest households participate  
112 in a social protection program [25].

113           Social protection is a potentially invaluable tool to address poverty and vulnerability  
114 within a world undergoing major changes - whether that be to its climate, AI technologies, or the

115 post-pandemic upheaval. Given the evidence that deserving individuals do not receive their  
116 entitled benefits, we reviewed the literature to explore why programs do not reach the poorest of  
117 the poor and realize their full potential. As social protection is a vast domain, our review will  
118 focus on non-contributory social assistance (e.g., cash transfers, food subsidies, public works  
119 programs), microfinance programs, and social health protection. Each of these branches falls  
120 within our interests of state-sanctioned and long-term resources targeted toward the poorest of  
121 the poor.

122

### 123 **Methods**

124 A formal search of four databases - EconLit, Global Health Database, MEDLINE,  
125 SocINDEX - yielded 497 articles. See Table 1 for a list of search terms. These papers were first  
126 filtered by title and abstract; 154 papers were assessed for eligibility based on full-text review  
127 and 30 met our inclusion criteria. See Table 2 for inclusion and exclusion criteria. We  
128 supplemented the search through citation tracking from reference sections of our selected papers.  
129 Additional supplementary searches about specific programs were performed as needed using  
130 Google. This yielded an additional 12 papers. Figure 1 presents the Preferred Reporting Items for  
131 Systematic Reviews and Meta-analysis (PRISMA) [26] flow diagram detailing our search  
132 process. Ethics clearance was received from the University of Alberta's Alberta Research  
133 Information Services (ARISE) System (PRO#00117838).

134

135

136

137

138 **Table 1**  
139 Keywords in Literature Search.  
140

---

“South Asia” OR “India” OR “Pakistan” OR “Bangladesh” OR “Sri Lanka” OR  
“Afghanistan” OR “Nepal” AND “social protection” OR “programme” OR “safety net”  
OR “vouchers” OR “income support” AND “poverty” OR “impoverished” OR  
“vulnerable” OR “socially excluded” OR “caste” OR “marginalized” AND “targeting”  
OR “efficiency” OR “inequity”

---

141  
142 **Table 2**  
143 Inclusion and Exclusion Criteria for Systematic Review.  
144

---

| Inclusion Criteria                                                                                                         | Exclusion Criteria                                                                                                                        |
|----------------------------------------------------------------------------------------------------------------------------|-------------------------------------------------------------------------------------------------------------------------------------------|
| Published in the peer-reviewed literature only.                                                                            | Non-English language.                                                                                                                     |
| English language between 2000-2023.                                                                                        | Non-peer-reviewed or non-empirical publications (i.e., evaluation reports, working papers, reviews, commentaries, news items, magazines). |
| Qualitatively or quantitatively evaluates factors that inhibit South Asian poor from accessing social protection programs. | Theoretical and econometric-driven research.                                                                                              |
| Acknowledges and highlights the role of social and political factors in program outcomes.                                  | Short-term programs implemented by non-governmental or civil society organizations.                                                       |
|                                                                                                                            | Publications not evaluating South Asian social protection programs targeted toward the poor.                                              |
|                                                                                                                            | Evaluation of program outputs only, failing to assess processes related to targeting the poor.                                            |

---

145  
146 **Figure 1**  
147 PRISMA 2020 Flow Diagram.

148 Descriptive data were extracted from each study, including the country of the social  
149 protection program, research method, sample size, and key findings. The Grading of

150 Recommendations, Assessment, Development, and Evaluations (GRADE) [27] and GRADE-  
151 CERQual (Confidence in the Evidence from Reviews of Qualitative Research) [28] criteria were  
152 used to assess the quality of quantitative and qualitative studies, respectively. Mixed-method  
153 studies were evaluated using both criteria. Following the appraisal, papers were categorized  
154 based on their quality score of high, medium, or low. Only high and medium quality score papers  
155 were included in the review. See Table 3 for detailed summaries of all papers.

156



157 **Table 3**  
 158 Summary of Reviewed Literature.  
 159

| Author, year [reference]           | Country    | Social Protection Program                                 | Type of Study                                                     | Number of Participants/ Secondary Data Source                                                                        | Significant Findings                                                                                                                                                    | Quality of Study |
|------------------------------------|------------|-----------------------------------------------------------|-------------------------------------------------------------------|----------------------------------------------------------------------------------------------------------------------|-------------------------------------------------------------------------------------------------------------------------------------------------------------------------|------------------|
| Akerkar <i>et al.</i> , 2016 [39]  | India      | Mahatma Gandhi National Rural Employment Guarantee Scheme | Qualitative – in-depth interviews                                 | 54 individuals                                                                                                       | Social protection dismissed the impact of local moral and political economies in overruling entitlement to social protection.                                           | High             |
| Asadullah & Ara, 2016 [35]         | Bangladesh | Targeting the Ultra-Poor                                  | Quantitative – four-round panel survey                            | Survey 1 - 5626 households<br>Survey 2 - 5228 households<br>Survey 3 - 4559 households<br>Survey 4 - 4038 households | In short- and medium-term, program participation positively impacts food security, savings, and self-employment. However, the long-term program impact is much smaller. | High             |
| Asri, 2019 [56]                    | India      | National Old Age Pension Scheme                           | Quantitative – cross-sectional secondary data analysis            | India Human Development Survey – 215,753 individuals                                                                 | Unwarranted possession of the Below Poverty Line ration card and connections to local officials facilitated pension exploitation by non-poor older people.              | High             |
| Bechange <i>et al.</i> , 2021 [68] | Pakistan   | Lady Health Workers                                       | Qualitative - in-depth interviews, focus group discussions (FGDs) | 73 individuals                                                                                                       | Patients did not comply with LHWs referrals for eye care due to gendered mobility restrictions, no transportation, poverty, and a lack of trust in public health care.  | High             |
| Das <i>et al.</i> , 2012 [46]      | India      | Mahatma Gandhi National Rural Employment                  | Quantitative – cross-sectional survey                             | 60 individuals                                                                                                       | Program corruption and inefficiency resulted from the beneficiaries' lack of awareness of                                                                               | High             |

|                                 |            | Guarantee Scheme                                                                  |                                                                    |                                                                                                                                | program guidelines and entitlements.                                                                                                                                                                                                   |      |
|---------------------------------|------------|-----------------------------------------------------------------------------------|--------------------------------------------------------------------|--------------------------------------------------------------------------------------------------------------------------------|----------------------------------------------------------------------------------------------------------------------------------------------------------------------------------------------------------------------------------------|------|
| Das, 2015 [45]                  | India      | Mahatma Gandhi National Rural Employment Guarantee Scheme                         | Quantitative - secondary data analysis                             | 66 <sup>th</sup> National Sample Survey – 281,327 individuals<br>68 <sup>th</sup> National Sample Survey – 280,763 individuals | Compared to better-off households, the poor were less likely to receive employment through the Scheme after demanding it.                                                                                                              | High |
| Drucza, 2016 [49]               | Nepal      | Dalit Child Grant, Single Women Allowance                                         | Qualitative – in-depth interviews, surveys                         | 48 beneficiaries, 9 local informants, 14 non-beneficiaries                                                                     | Cash transfers increased perceptions of social inclusion but did not create equal opportunity. Transfer amounts were low, and governing bodies were often corrupt.                                                                     | High |
| Gaiha <i>et al.</i> , 2001 [69] | India      | Integrated Rural Development Programme, Jawahar Rozgar Yojana, Rural Public Works | Quantitative - cross-sectional secondary data analysis             | 43rd National Sample Survey<br>50th National Sample Survey                                                                     | Programs encountered elite capture, mainly through the local <i>Panchayats</i> . High inclusion and exclusion errors in all programs.                                                                                                  | High |
| Galasso & Ravallion, 2005 [44]  | Bangladesh | Food-for-Education                                                                | Quantitative – cross-sectional secondary data analysis             | Household Expenditure Survey – 3625 households                                                                                 | Improved intra-village targeting was associated with lower land inequality as the poor had greater decision-making entitlement.                                                                                                        | High |
| Gautam & Andersen, 2017 [37]    | Nepal      | Nepal Food Corporation, Food-for-Work                                             | Mixed-methods – cross-sectional survey + in-depth interviews, FGDs | 313 households surveyed<br>13 interviews, 10 FGDs                                                                              | Programs maintained intra-village inequalities. High-caste households exploited their political and social connections to receive more benefits from the program, and community projects were incompatible with the needs of the poor. | High |

|                                 |            |                                                           |                                                        |                                                            |                                                                                                                                                                                                                                                      |      |
|---------------------------------|------------|-----------------------------------------------------------|--------------------------------------------------------|------------------------------------------------------------|------------------------------------------------------------------------------------------------------------------------------------------------------------------------------------------------------------------------------------------------------|------|
| Hasan <i>et al.</i> , 2022 [77] | Bangladesh | Shasthyo Shuroksha Karmasuchi                             | Quantitative - cross-sectional survey                  | 806 households                                             | Program awareness coincided with increased use of subsidized healthcare. Non-Below Poverty Line households were more likely to participate.                                                                                                          | High |
| Imai & Sato, 2012 [89]          | India      | Integrated Rural Development Programme                    | Quantitative – cross-sectional secondary data analysis | 50th National Sample Survey<br>55th National Sample Survey | Land inequality negatively impacted program availability. Decentralization was associated with elite capture.                                                                                                                                        | High |
| Jha <i>et al.</i> , 2009 [40]   | India      | Mahatma Gandhi National Rural Employment Guarantee Scheme | Quantitative – cross-sectional survey                  | 942 households                                             | In Andhra Pradesh, wage rates, land inequality, and politicization increased program capture.                                                                                                                                                        | High |
| Jha <i>et al.</i> , 2011 [90]   | India      | Rural Public Works                                        | Quantitative - cross-sectional secondary data analysis | 50th National Sample Survey<br>61st National Sample Survey | Program experiences capture from the general population, as well as upper wealth quintiles of the Scheduled Castes and Schedules Tribes.                                                                                                             | High |
| Jha <i>et al.</i> , 2013 [63]   | India      | Targeted Public Distribution System                       | Quantitative – cross-sectional survey                  | 1500 households                                            | Real income transfers through the program were contingent on land inequality, economic status, demographic characteristics, and the high transaction costs of participation. Targeting was insufficient as both poor and non-poor receive subsidies. | High |
| Jha <i>et al.</i> , 2013 [47]   | India      | Mahatma Gandhi National Rural Employment Guarantee Scheme | Quantitative - cross-sectional survey                  | 4561 individuals                                           | Average number of days worked was less than half of the maximum days, and wages were below minimum requirement. However, program wage was higher than local agricultural wage, increasing capture.                                                   | High |

|                                  |            |                                     |                                              |                                                                                                                          |                                                                                                                                                                                                                                                                  |        |
|----------------------------------|------------|-------------------------------------|----------------------------------------------|--------------------------------------------------------------------------------------------------------------------------|------------------------------------------------------------------------------------------------------------------------------------------------------------------------------------------------------------------------------------------------------------------|--------|
| Kabeer <i>et al.</i> , 2010 [57] | Pakistan   | Public Zakat                        | Qualitative - FGDs, key informant interviews | Number of interviews unspecified.                                                                                        | Zakat did not reach the poorest of the poor and instead went to well-connected households.                                                                                                                                                                       | Medium |
| Kannan & Pillai, 2010 [64]       | India      | Targeted Public Distribution System | Quantitative – cross-sectional survey        | 1064 households                                                                                                          | Insufficient supply-side resources to address food insecurity and accessibility challenges such as distance, time, and discrimination.                                                                                                                           | High   |
| Khan, 2021 [50]                  | India      | Targeted Public Distribution System | Quantitative - cross-sectional survey        | 490 individuals                                                                                                          | Destitute informal workers did not have Below Poverty Line cards and could not access the program.                                                                                                                                                               | High   |
| Mazumdar & Sharma, 2013 [60]     | India      | Targeted Public Distribution System | Quantitative – cross-sectional survey        | 2998 households                                                                                                          | High targeting errors as multidimensional deprivations were overlooked in beneficiary identification.                                                                                                                                                            | High   |
| Misha <i>et al.</i> , 2019 [33]  | Bangladesh | Targeting the Ultra-Poor            | Quantitative – four-round panel survey       | Survey 1 – 5,626 households<br>Survey 2 – 5,228 households<br>Survey 3 – 4,549 households<br>Survey 4 – 4,144 households | Program had a short-term positive impact on employment as participants were likely to switch to entrepreneurship. However, results were unsustainable after nine years as most households that started as beggars or maids returned to the baseline occupations. | High   |
| Mishra & Kar, 2017 [62]          | India      | National Old Age Pension Scheme     | Quantitative - cross-sectional survey        | 200 households                                                                                                           | Scheme encountered high inclusion and exclusion errors and a low probability of participation from the bottom wealth quartiles.                                                                                                                                  | High   |
| Mukherjee & Kundu, 2012 [61]     | India      | Swarnajayanti Gram Swarozgar Yojana | Quantitative – two-round panel survey        | 2006 survey – 500 individuals<br>2008 survey – 469 individuals                                                           | Microfinance program expected poor households to repay loans. Targeting via Below Poverty Line classification led to inclusion and exclusion errors. No sampled                                                                                                  | High   |

|                                  |            |                                                                                         |                                                                           |                                                                  |                                                                                                                                                                                                               |      |
|----------------------------------|------------|-----------------------------------------------------------------------------------------|---------------------------------------------------------------------------|------------------------------------------------------------------|---------------------------------------------------------------------------------------------------------------------------------------------------------------------------------------------------------------|------|
|                                  |            |                                                                                         |                                                                           |                                                                  | program participants were extremely poor.                                                                                                                                                                     |      |
| Mumtaz <i>et al.</i> , 2014 [70] | Pakistan   | Lady Health Workers, Benazir Income Support Program, maternal health programs (general) | Qualitative – in-depth interviews, FGDs, case studies, observations       | 94 interviews, 11 FGDs, 134 observation sessions, 5 case studies | Interventions did not reach poor, vulnerable women due to their social invisibility, and socioeconomic dependence on the rich upper-caste to access care.                                                     | High |
| Mumtaz <i>et al.</i> , 2013 [65] | Pakistan   | Lady Health Workers                                                                     | Mixed-method - cross-sectional survey + in-depth interviews, observations | 803 individuals surveyed<br>48 interviews                        | Lady Health Workers were more likely to visit and assist those within their <i>biradari</i> and social geography. They also encountered limited mobility due to gender and caste.                             | High |
| Mumtaz <i>et al.</i> , 2015 [38] | Pakistan   | Community Midwife Program                                                               | Qualitative – in-depth interviews, FGDs, observations                     | 239 individuals                                                  | Program design was built upon assumptions that overlooked the social and gender norms interfering with the Midwives’ ability to establish private practices.                                                  | High |
| Murgai & Zaidi, 2005 [91]        | Bangladesh | Food-for-Education                                                                      | Quantitative - cross-sectional secondary data analysis                    | 2000 Household Income and Expenditure Survey - 7440 households   | Program decentralization was pro-poor in that it improved beneficiary identification. However, a high percentage of the eligible population was not covered by the program, and elite capture still occurred. | High |
| Nair, 2011 [54]                  | India      | Targeted Public Distribution System                                                     | Quantitative – cross-sectional survey                                     | 400 households                                                   | Poor beneficiary identification strategies and high exclusion errors reduced program effectiveness. Well-off withdrew from                                                                                    | High |

|                                   |       |                                                            |                                                        |                                                                                         |                                                                                                                                                                                                               |        |
|-----------------------------------|-------|------------------------------------------------------------|--------------------------------------------------------|-----------------------------------------------------------------------------------------|---------------------------------------------------------------------------------------------------------------------------------------------------------------------------------------------------------------|--------|
|                                   |       |                                                            |                                                        |                                                                                         | participation due to low program perception.                                                                                                                                                                  |        |
| Nandi <i>et al.</i> , 2013 [92]   | India | Rashtriya Swasthya Bima Yojana                             | Quantitative - cross-sectional secondary data analysis | 2007 District Level Household Survey - 590 districts<br>RSBY Web Portal Enrollment Data | Districts with low governance and a high share of low-caste population were less likely to participate. Districts with more non-poor households were more likely to participate.                              | High   |
| Nayak, 2012 [51]                  | India | Mahatma Gandhi National Rural Employment Guarantee Scheme  | Quantitative - cross-sectional survey                  | 262 individuals                                                                         | Program experienced elite capture; non-tribal Below Poverty Line cardholders were likelier to participate than tribal. Caste, education, and program awareness were all positive predictors of participation. | High   |
| Nichols, 2016 [67]                | India | Food and Nutritional Security programs                     | Qualitative – semi-structured interviews               | 81 individuals                                                                          | Programs that exclusively targeted women enforced an additional gendered labour burden and reduced time commitment to existing workloads.                                                                     | High   |
| Niehaus <i>et al.</i> , 2013 [55] | India | Below/Above Poverty Line Classification System             | Quantitative – cross-sectional survey                  | 14,074 households                                                                       | The Below Poverty Line system was not found to be a progressive targeting strategy as it had high inclusion and exclusion errors, likely due to low enforceability.                                           | High   |
| Patel <i>et al.</i> , 2018 [71]   | India | Janani Suraksha Yojana, Accredited Social Health Activists | Qualitative - in-depth semi-structured interviews      | 18 individuals                                                                          | Scheduled Caste women encountered barriers in accessing maternal healthcare. These included unjustified excess fees, transportation costs, lack of program information, and discrimination.                   | Medium |

|                                   |          |                                                           |                                                         |                                                                             |                                                                                                                                                                                                             |        |
|-----------------------------------|----------|-----------------------------------------------------------|---------------------------------------------------------|-----------------------------------------------------------------------------|-------------------------------------------------------------------------------------------------------------------------------------------------------------------------------------------------------------|--------|
| Pattenden, 2011 [48]              | India    | Mahatma Gandhi National Rural Employment Guarantee Scheme | Qualitative – semi-structured interviews                | Number of interviews unspecified.                                           | For low-caste, poor female labourers, accessibility to social protection was dependent on autonomy from the dominant class.                                                                                 | High   |
| Pattenden, 2017 [41]              | India    | Mahatma Gandhi National Rural Employment Guarantee Scheme | Mixed-methods – longitudinal fieldwork + surveys        | 1200 households surveyed<br>Number of interviews unspecified.               | Dominant class possessed the power to determine whether or not program implementation would be pro-poor.                                                                                                    | Medium |
| RamPrakash & Lingam, 2021 [53]    | India    | Chief Minister’s Comprehensive Health Insurance Scheme    | Qualitative - in-depth interviews                       | 63 individuals                                                              | Gendered barriers and household, community, and programmatic level exclusion lowered program participation.                                                                                                 | High   |
| Randive <i>et al.</i> , 2014 [59] | India    | Janani Suraksha Yojana                                    | Quantitative – cross-sectional secondary data analysis  | District Level House Survey, Annual Health Survey I and II, Census of India | Despite cash incentives, there remained high inequality in maternal mortality rates between rich and poor. Male literacy and poverty explained 70% of the inequality in seeking out institutional delivery. | High   |
| Roy, 2021 [42]                    | India    | Mahatma Gandhi National Rural Employment Guarantee Scheme | Qualitative – quasi-structured interviews and fieldwork | Not Specified.                                                              | Labouring class accessibility to the Scheme was a by-product of class coalitions and the political will of the elite.                                                                                       | Medium |
| Sajid <i>et al.</i> , 2019 [58]   | Pakistan | Public Zakat                                              | Quantitative - cross-sectional survey                   | 486 households                                                              | Program experienced capture by upper wealth quintiles. Local Zakat committees also distributed funds based on their discretion.                                                                             | High   |
| Sinha, 2018 [43]                  | India    | Rashtriya Swasthya Bima Yojana                            | Quantitative - cross-sectional survey                   | 1643 households                                                             | Program did not reduce catastrophic health expenditures or increase facility treatment for poor enrolled households.                                                                                        | High   |

|                                 |            |                               |                                                              |                  |                                                                                                                                |        |
|---------------------------------|------------|-------------------------------|--------------------------------------------------------------|------------------|--------------------------------------------------------------------------------------------------------------------------------|--------|
| Walker & Matin, 2006 [34]       | Bangladesh | Targeting the Ultra-Poor      | Mixed-methods - participatory group exercise + questionnaire | 60 individuals   | For poor beneficiaries, the program was unsustainable and did not cause any change. Most did not know how to use health cards. | Medium |
| Zaidi <i>et al.</i> , 2010 [52] | Pakistan   | Livelihood Support Cash Grant | Quantitative – cross-sectional survey                        | 2,612 households | Only one in two households receiving the Grant was eligible, and one in two eligible households were excluded.                 | Medium |



161 Data analysis was guided by Thomas & Harden’s [29] thematic synthesis approach. We  
162 first read the papers in detail and conducted a line-by-line coding. The codes were classified to  
163 develop descriptive categories. We then proceeded to conduct axial coding and inductive  
164 reasoning to develop broader analytical themes across the 42 papers. The iterative and data-  
165 driven approach allowed us to synthesize a higher-order interpretation of the literature as  
166 opposed to simply summarizing the findings. Importantly, this is not an exhaustive review but  
167 rather an analytical and thematic interpretation of the narrative surrounding South Asian social  
168 protection programs.

169

## 170 **Results**

171 The articles in our review evaluate social protection initiatives across four countries -  
172 Bangladesh, India, Nepal, and Pakistan - collectively comprising over 95% of the South Asian  
173 population [30]. We identified 27 studies from India, seven from Pakistan, six from Bangladesh,  
174 and two from Nepal. Twenty-seven studies drew upon quantitative data, 11 used qualitative data,  
175 and four used both. The 42 papers researched a total of 23 programs. Table 4 summarizes these  
176 programs by country.

177  
178  
179

**Table 4**  
Summary of Identified Social Protection Programs. \*

| Country    | Program                                                       | Type of program                  | Eligible population                                      | Program ongoing | Program summary                                                                                                                                                                                                                                                                                           | Literature |
|------------|---------------------------------------------------------------|----------------------------------|----------------------------------------------------------|-----------------|-----------------------------------------------------------------------------------------------------------------------------------------------------------------------------------------------------------------------------------------------------------------------------------------------------------|------------|
| Bangladesh | Challenging the Frontiers of Poverty-Targeting the Ultra-Poor | Microfinance                     | Households identified as ultra-poor who meet criteria    | Yes             | The program aims to help participants graduate from poverty by engaging them in sustainable entrepreneurial activities through education, training, and small loans. Launched in 2002, it targets poor, often landless, women earning less than \$0.60-\$0.70/day.                                        | [33-35]    |
|            | Food-for-Education                                            | School enrollment & food subsidy | Poor children in public school                           | Yes**           | Introduced in 1993, the program provided a free ration of grains to school children from poor families, to either consume or sell [93]. Households are targeted by community members who are also responsible for the distribution of entitlements (15kg for one child and 20kg for more than one child). | [44,91]    |
|            | Shasthyo Shuroksha Karmasuchi                                 | Healthcare subsidy               | Below Poverty Line households                            | Yes             | A pilot project aiming to reduce catastrophic out-of-pocket healthcare expenditures for poor households. The program covers inpatient healthcare services for 78 disease conditions at registered health facilities in three <i>upzilas</i> (Kalihati, Madhupar, and Ghatail).                            | [77]       |
| India      | Chief Minister's Comprehensive Health Insurance Scheme        | Health Insurance                 | Below Poverty Line households                            | Yes             | The program is a public-private partnership that covers medical and surgical treatment in empanelled hospitals in the state of Tamil Nadu. Eligible households must have an annual income of less than INR 72000, as proved by a ration card and income certificate.                                      | [53]       |
|            | Food & Nutritional Security Programs                          | Food security                    | N/A                                                      | N/A             | A basket of programs aimed at addressing malnutrition by providing food rations, with a focus on mothers and children. It includes the Targeted Public Distribution System, Anganwadi Centres, Auxiliary Nurses and Midwives, and Accredited Social Health Activists.                                     | [67]       |
|            | Integrated Rural Development Programme                        | Microfinance                     | Below Poverty Line households                            | Yes**           | First launched nationally in 1980, the program provides government subsidies and low-interest credit to poor households. It has now been merged with the Swarnajayanti Gram Swarozgar Yojana initiative, a microfinance program.                                                                          | [69,89]    |
|            | Janani Suraksha Yojana                                        | Cash incentive                   | Pregnant women in states with low institutional delivery | Yes             | A cash-incentive to encourage women to give birth in a health facility. Rural women are given \$31 and urban women \$22.                                                                                                                                                                                  | [59,71]    |

|                                                           |                  |                                                               |       |                                                                                                                                                                                                                                                                                                                                                                                                                                                                                                                                                           |                  |
|-----------------------------------------------------------|------------------|---------------------------------------------------------------|-------|-----------------------------------------------------------------------------------------------------------------------------------------------------------------------------------------------------------------------------------------------------------------------------------------------------------------------------------------------------------------------------------------------------------------------------------------------------------------------------------------------------------------------------------------------------------|------------------|
| Jawahar Rozgar Yojana                                     | Employment       | Rural men and women                                           | Yes** | An employment generation program. Projects are determined by village <i>Gram Panchayat</i> members, with priority given to the development of rural infrastructure.                                                                                                                                                                                                                                                                                                                                                                                       | [69]             |
| Mahatma Gandhi National Rural Employment Guarantee Scheme | Employment       | Rural men and women                                           | Yes   | Introduced in 2005, the Scheme is a flagship initiative based on a constitutional commitment to provide 100 days of public work to rural households at statutory minimum wage. Rural men and women interested in participating apply through their local <i>Gram Panchayats</i> . There they are given job cards and can officially request work by filing written applications; if they are not given employment within two weeks, they are entitled to compensation via unemployment allowance. It is also mandatory that 33% of participants be women. | [39-42,45-48,51] |
| National Old Age Pension Scheme                           | Pension          | Below Poverty Line aged 60+                                   | Yes   | Old age beneficiaries receive 200 INR / month till the age of 79, after which they receive 500 INR / month [94].                                                                                                                                                                                                                                                                                                                                                                                                                                          | [56,62]          |
| Rashtriya Swasthya Bima Yojana                            | Health insurance | Below Poverty Line households, and other disadvantaged groups | Yes   | Introduced in 2008 as a cushion for poor households to avoid falling into poverty from catastrophic health expenditures. For an annual registration fee of 30 INR, the program covers up to 30,000 INR of inpatient treatment for five household members per year.                                                                                                                                                                                                                                                                                        | [43,92]          |
| Rural Public Works                                        | Employment       | Rural men and women                                           | Yes** | Employment generation program intended to develop rural infrastructure and provide work during agricultural slack periods.                                                                                                                                                                                                                                                                                                                                                                                                                                | [69,90]          |
| Swarnajayanti Gram Swarozgar Yojana                       | Microfinance     | Below Poverty Line households                                 | Yes   | A microcredit initiative that offers loans to support business development for women from Below Poverty Line households. Through either self-selection or the support of local leaders and organizations, participants are allocated into self-help groups where each member must contribute regularly to the outstanding loan. Through progressive lending, borrowers must pass a series of liability tests to become eligible for a greater amount of credit.                                                                                           | [61]             |
| Targeted Public Distribution System                       | Food subsidy     | Below Poverty Line and Antyodaya Anna Yojana households       | Yes   | In 1997, the Public Distribution became a targeted scheme that sells subsidized grains, sugar, oil, and kerosene through government-owned Fair Price Shops. The program was restricted to Below Poverty Line and Antyodaya Anna Yojana households, who were entitled to 35kg of food                                                                                                                                                                                                                                                                      | [50,54,60,63,64] |

|                 |                                  |                             |                                                           |       |                                                                                                                                                                                                                                                                           |            |
|-----------------|----------------------------------|-----------------------------|-----------------------------------------------------------|-------|---------------------------------------------------------------------------------------------------------------------------------------------------------------------------------------------------------------------------------------------------------------------------|------------|
|                 |                                  |                             |                                                           |       | grains per month, with the latter group having an additional subsidy as they are categorized as the poorest of the poor.                                                                                                                                                  |            |
| <b>Nepal</b>    | Dalit Child Grant                | Cash transfer               | Poor Dalit children under 5 years of age                  | Yes   | Aims to address food insecurity and nutritional deficits by offering Dalit households 200 NPR per month for a maximum of two children under the age of 5 for five years.                                                                                                  | [49]       |
|                 | Food-for-Work                    | Employment & food subsidy   | Food insecure villages                                    | Yes   | Operating under the World Food Program, the initiative aims to improve food security while building rural infrastructure, focusing on agricultural development.                                                                                                           | [37]       |
|                 | Nepal Food Corporation           | Food subsidy                | Food insecure districts                                   | Yes   | Introduced by the government in 1974, the Corporation provides subsidized grains to 30 remote and food insecure districts. Households are allocated 5 kg of rice per person per month.                                                                                    | [37]       |
|                 | Single Women Allowance           | Cash transfer               | Widows or single women aged 60+                           | Yes   | Acting as a form of social security allowance, the grant provides single women with a monthly transfer of 500 NPR.                                                                                                                                                        | [49]       |
| <b>Pakistan</b> | Benazir Income Support Programme | Unconditional cash transfer | Ever-married women aged 18+ who meet eligibility criteria | Yes** | Beneficiaries are paid in quarterly installments of 5,000 PKR [95]. Eligibility criteria include being female, monthly income less than PKR 6,000, no family member in government service, and not being a beneficiary of any other program [96].                         | [70]       |
|                 | Community Midwife Program        | Healthcare services         | Rural women                                               | Yes   | Adopted in 2006, the midwife program trains girls in skilled birth attendance to provide maternity care in rural villages. Midwives are expected to attract fee-paying clients by establishing a private practice.                                                        | [38]       |
|                 | Lady Health Workers              | Healthcare services         | Individuals in rural and urban slums                      | Yes   | Community health worker program aimed at providing domiciliary primary healthcare services with a focus on maternal and child care.                                                                                                                                       | [65,68,70] |
|                 | Livelihood Support Cash Grant    | Cash transfer               | Eligible households in earthquake-affected areas          | No    | Introduced following the 2005 earthquake to provide affected households with 6 monthly installments of 3,000 PKR [97]. Beneficiary households must meet criteria such as severe housing damage, no male members aged 18-60, and/or low-ranking or no government officers. | [52]       |
|                 | Zakat Program                    | Unconditional cash transfer | Poor households                                           | Yes   | A tax-financed social transfer program based on the Islamic principle of charity. Funds are distributed by Local Zakat Committees, which are also responsible for identifying the poor.                                                                                   | [57,58]    |

180

181

182

\* Summaries are provided according to the program design at the time of the most recent paper included in the review.

\*\* Program has been re-named, merged with another initiative, or modified.

183 Our analysis identified five themes underscoring the constructs and processes implicated  
184 in withholding social protection programs from reaching the poorest of the poor. These are  
185 summarized in Figure 2.

186 **Figure 2**

187 Summary of five themes inhibiting social protection programs from realizing their full potential  
188 in reaching the poor.

189

190

191 **Structural Flaws in Program Theory**

192 Our review indicates that most programs had flawed program theory which outlines how an  
193 initiative will produce its intended outcomes (i.e., the program design) [31]. Program theories  
194 frequently rely on oversimplified linear models of cause and effect and presuppose that their one-  
195 dimensional initiatives will produce a chain of consequential impacts. They fail to consider the  
196 multi-dimensionality of poverty and how it is rooted in the broader social, economic, and  
197 political structures that adversely shape incorporation into society. This is best exemplified by  
198 Bangladesh's Challenging the Frontiers of Poverty Reduction: Targeting the Ultra-Poor  
199 initiative, which aimed to redirect the destitute from low-skill occupations through education,  
200 income generation training, and microfinance loan services [32,33]. However, evaluations of the  
201 program showed that the landless households experienced negligible gains from participation  
202 [34]. Entrepreneurial activity increased in the short- and medium-term following program  
203 graduation, but the results were not sustainable in the long term [33,35]. Most beneficiaries  
204 returned to their baseline occupations, often as beggars and maids [33,35]. We argue this  
205 happened because the program's design assumed that poverty is transient and that a one-time  
206 offer of micro-entrepreneurship support was sufficient to matriculate from penury [36]. It

207 ignored the multiple forces operating to keep the poor poor, including their systematic exclusion  
208 from markets and the social relationships between and within networks that underpin  
209 entrepreneurial activities.

210 Another example of program theory deficiencies is the Nepal Food Corporation, which  
211 provides subsidised rice for the poor. The program required the beneficiaries collect the rice  
212 from central depots, which are located at significant distances from the remote villages where the  
213 target beneficiaries live [37]. Since the destitute lack the financial capital to travel to the central  
214 depots, the gap in service is filled by individuals with the means to purchase and transport large  
215 quantities of grains for the entire village. These middlemen sell the government-subsidized rice  
216 for a hefty profit - citing ‘transportation costs’ - forcing the poor to purchase their entitled rice  
217 quotas through high-interest credit. Consequently, the poor, low-caste Dalits only have 2% of  
218 their food needs met through the social protection program [37]. This crucial flaw in program  
219 design minimizes the program’s impact on food insecurity, instead nurturing profits for the rich  
220 and poverty for the poor.

221 Other program theories held built-in assumptions that inherently required that  
222 beneficiaries have a certain degree of wealth. The Community Midwife Program in Pakistan  
223 serves as an illustrative example. This program aimed to ensure skilled birth attendance for  
224 impoverished rural women. However, its placement within the private sector proved to be a  
225 fundamental flaw [38]. Cognizant of the dissonance between providing a service for the poor,  
226 while locating the midwives in the private sector, program managers suggested midwives charge  
227 a modest fee of USD 0.66 USD for childbirth. Yet, to maintain their practices, the midwives  
228 needed to charge fees 10 to 20 times higher than recommended. This private-sector-based  
229 approach ultimately failed to meet its objectives, imposing unrealistic financial burdens on both

230 the impoverished women it aimed to serve and the midwives themselves. Over-estimation of the  
231 poor's assets was also evident in Nepal's Food-for-Work initiative, which has three-fold  
232 objectives: (1) improve agricultural output; (2) build road infrastructure to increase market  
233 accessibility; (3) provide poor households with employment opportunities by working on the  
234 farms or building infrastructure, for which they are paid in-kind with rice [37]. In the district of  
235 Humla, the program only benefitted the high-caste, rich landowners since they got cheap  
236 agricultural labour and road access from their lands to markets. Meanwhile, the landless,  
237 chronically poor - the key target group - got nothing more than an insufficient amount of rice,  
238 meeting only 15% of a household's food requirements [37]. The initiative is essentially futile and  
239 trivial for the poor, for it failed to achieve its stated objectives of reducing food insecurity and  
240 poverty.

241

## 242 **Elite Capture of Social Protection Programs**

243 The second theme emerging in our review was the concentration of power in the hands of the  
244 South Asian elite and how this impeded program reach to the poorest of the poor. In this context,  
245 the denomination of the elite is based on their status as high-caste, with its associated  
246 opportunities, privileges, and entitlements [37,39-42]. This includes land ownership, wealth, and  
247 membership in networks that sustain their dominant social and political identities.

248

### 249 *Direct appropriation of benefits by the elite*

250 The first pattern of elite capture is a traditional form of corruption in which the non-poor  
251 participate in welfare programs meant for the poor. For instance, in their sample, Sinha [43]  
252 found that 47% of households enrolled in India's Rashtriya Swasthya Bima Yojana health

253 insurance scheme were non-poor. In Nepal and Bangladesh, the elite captured, or in simpler  
254 terms stole, subsidized grains meant for the food-insecure poor. Through secret transactions with  
255 program managers in Nepal's Food Corporation program, large quantities of rice meant for the  
256 poor were diverted to local hotel owners to brew alcohol [37]. Bangladesh's Food-for-Education  
257 program encountered a similar appropriation of grains. Despite providing medium-quality rice to  
258 disincentivize wealthy households, the rich still captured the resource - not for their  
259 consumption, but rather as a payment source to their poor servants [44]. The landed rich also  
260 captured India's Mahatma Gandhi National Rural Employment Guarantee Scheme, a program  
261 designed to employ the rural poor. Those in the highest wealth quintile not only took over the  
262 employment opportunities meant for the landless, the illiterate, and the poor, but they also earned  
263 a higher daily wage [39,41,45-48]. Over 25% of poor households who sought work did not  
264 receive it despite being 'guaranteed' 100 days of work [45].

265

### 266 ***Elite's capture of resources through their power over program implementation***

267 The elite also capture resources via the power they hold as social protection program  
268 implementers. Most program managers are the local elite since they meet the educational  
269 requirements and have the social capital needed to access such job opportunities. This role gives  
270 the traditional, informally powerful elite formal power. It simultaneously situates the poor at the  
271 mercy of the very people responsible for their subordination. In Nepal, personnel responsible for  
272 distributing cash transfers to the poor under the Dalit Child Grant delayed payments, instead  
273 redirecting funds into their personal accounts to collect interest [49]. Likewise, the elite captured  
274 the implementation of India's Mahatma Gandhi National Rural Employment Guarantee Scheme.  
275 The program aimed to build village infrastructure and simultaneously provide employment



276 opportunities for rural men and women [41,42]. The program planners designated the *Gram*  
277 *Panchayat*, a village-level governing council, as the implementing body responsible for all  
278 program tasks, including employment of labourers and allocation of work hours [41,42]. *Gram*  
279 *Panchayat* are traditionally made up of land affluent dominant classes. Many evaluations noted  
280 that the *Gram Panchayat* members captured the government-funded labour sources for their  
281 personal farms and other private projects [41,42]. For example, Pattenden [41] found that in the  
282 village of Panchnagaram, the appropriation of labour led to a third of the local program funding  
283 being allocated towards projects on the private lands of the *Gram Panchayat* members. These  
284 elites also disincentivized the poor from applying to the program by delaying and withholding  
285 wages, sharing misinformation, requiring hidden fees, hiring through nepotism, and, in some  
286 cases, preventing registration by withholding applications [39,41,42,46,48]. Ultimately, rather  
287 than reducing poverty, the program reproduced and even strengthened the dynamics of  
288 traditional inequity [41].

289

### 290 ***The necessity of elite patronage & their gatekeeping role***

291 The literature highlights how the elite often act as gatekeepers, controlling access to social  
292 protection for the poor. Here lies the catch-22 of social protection: it is supposed to offer an  
293 opportunity for the destitute to lower their dependency and potentially disengage from abusive  
294 relationships with the elite, but program design ensures it is precisely these relationships that the  
295 poor require to access the programs. Ideally, program accessibility should be based on state-  
296 citizen social contracts, but in South Asia, this ideal reigns inferior to the informal contracts with  
297 local elites [37,39]. The politically and socially powerful groups dictate the distribution of  
298 resources based on caste and *biraderi* (kin) relationships [38,39,50-52]. Due to their high

299 decision-making entitlement and low accountability, they act as the poor's primary route to  
300 access social protection [39,53]. In India, these bonds between the powerful and poor are so  
301 integral to societal structure that the practice of their formation has been given the special name  
302 of *bhav-vyavhar*, or the emotional and behavioural relationship building with the elite [39].  
303 *Bhav-vyavhar* occurs through social transactions such as the poor offering free physical labour,  
304 emotional support, and even financial transfers, including a portion of their pension.

305 In India and Pakistan, some program designs allocated the task of identifying poor  
306 households to municipal-level officials and the village elite (often the same group). These  
307 officials registered their non-poor family and friends instead of the destitute [54,55]. In India, the  
308 poor perceived India's National Old Age Pension Scheme as unequal and inaccessible since they  
309 lacked the social linkages necessary for participation in the program [56]. This is best reflected in  
310 the finding that 74% of deserving recipients were not receiving the Pension [56]. Gatekeeping  
311 was also operative in Pakistan's Zakat initiative, in which Local Zakat Committees, comprised of  
312 the community's well-off, are responsible for identifying the poor and eligible households [57].  
313 An evaluation by Sajid *et al.* [58] showed that in 2019, 40% of the beneficiaries were non-poor.

314 A powerful tool is the elite's control of knowledge about social programs' existence and  
315 benefits. Most program designs place the responsibility of disseminating information in the  
316 hands of the elite, like the Local Zakat Committees in Pakistan. An evaluation [58] found that the  
317 Committees were withholding this knowledge as 80% of eligible beneficiaries in their sample  
318 were unaware of the benefits they were entitled to. Das *et al.* [46] also reported censorship of  
319 information in their evaluation of India's Mahatma Gandhi National Rural Employment  
320 Guarantee Scheme. The elite forming the *Gram Panchayats* withheld information to ensure local

321 villagers remained unaware of the basic guidelines and operations of the program. Consequently,  
322 the poor beneficiaries were underpaid and underemployed.

323

### 324 **Targeting Errors**

325 The third theme in our review was the insensitivity of program design when targeting  
326 beneficiaries. The literature identified three targeting strategies traditionally used to reach  
327 recipients: geographic targeting, self-targeting, and data-based targeting. Geographic targeting  
328 purposively selects regions based on poverty or health indicators. Self-targeting (or self-  
329 selection) places the onus of identifying eligibility on the poor themselves. Data-based targeting  
330 relies on a pre-existing national dataset, such as India's Below Poverty Line classification. Our  
331 review showed that all three mechanisms failed to target their ideal beneficiaries sufficiently and  
332 were instead more likely to reach undeserving households.

333 The Janani Suraksha Yojana program in India illustrates the insensitivity of geographic  
334 targeting. This initiative specifically focused on states with low rates of institutional deliveries,  
335 introducing a cash incentive scheme to encourage women to deliver in healthcare facilities. [59].  
336 An evaluation in nine participating states revealed that all socioeconomic groups experienced a  
337 similar average increase in institutional birth. However, the reduction in maternal mortality was  
338 four times greater for the richest quintile compared to the poorest [59]. Thus, despite a principal  
339 program objective being to lessen financial barriers for *poor* women, the broad geographic  
340 targeting mechanism disproportionately benefited the rich living in these localities.

341 India's Mahatma Gandhi National Rural Employment Guarantee Scheme serves as a  
342 prime example of self-targeting. The program provides employment opportunities for unskilled  
343 labourers [47]. An evaluation [47] showed self-targeting permitted uptake by all socioeconomic

344 groups, irrespective of need. In the state of Tamil Nadu, only 40% of the participants were truly  
345 poor. Likewise, Pakistan’s Livelihood Support Cash Grant implemented a similarly ineffective  
346 form of self-targeting. Applications for the Grant were open to all, but applicants were subject to  
347 a screening process based on the government’s predetermined eligibility criteria [52]. Although  
348 the program enrolled nearly 700,000 families as beneficiaries, a community-based survey  
349 showed that half of the eligible families were excluded, while half of the ineligible rich were  
350 provided benefits [52].

351 A widely recognized static targeting strategy in India is based on classifying households  
352 as Below or Above Poverty Line through a state-level census. This classification is not  
353 infallible as an evaluation found that 70% of ineligible households in the state of Karnataka  
354 possessed Below Poverty Line cards, while 13% of eligible households did not [55]. The  
355 downstream consequences of this targeting flaw become evident in various social programs’  
356 failure to reach the poor [55,60]. One example is the failure of Swarnajayanti Gram Swarozgar  
357 Yojana microfinance program for the destitute. An evaluation [61] found that none of the  
358 beneficiaries in their sample were extremely poor, while over half of the program participants  
359 were from high-income households falsely possessing Below Poverty Line cards. Another  
360 example is the National Old Age Pension Scheme, in which non-poor Below Poverty Line  
361 cardholders had a higher likelihood of receiving the social allowance than poor cardholders [56].  
362 In fact, Mishra & Kar [62] found that 50% of the Pension recipients were from the top two  
363 income quartiles. A third example can be found in India’s Targeted Public Distribution System, a  
364 food ration initiative. Five evaluations [50,54,60,63,64] found that a large fraction of the wrongly  
365 classified and wealthy Below Poverty Line cardholders were receiving food rations, while a

366 substantial proportion of the poorest households were not covered by the program. These are  
367 worrying findings given that India’s poor lead a dangerous “hand-to-mouth existence” [50].

368

### 369 **Invisible and Unacknowledged Barriers**

370 Program designs failed to take into account a host of barriers handicapping the poor’s  
371 accessibility to social protection. These include gendered barriers, hidden costs, the poor’s lack  
372 of legal documentation, and the geographies of exclusion. We discuss each below.

373

#### 374 ***Gendered barriers***

375 Despite decades of advocacy, programs remain gender blind. In Pakistan, programs like the Lady  
376 Health Worker and Community Midwife are specifically designed to deliver domiciliary health  
377 care services to home-bound women in direct acknowledgment of the cultural practice of *pardah*  
378 (seclusion), and its’ associated value of male honor, limiting women's unaccompanied movement  
379 [38,65,66]. The same gender values also require that the health workers be female.

380 Consequently, only women are recruited as Lady Health Workers and Midwives to provide  
381 home-based services. In doing so, the program design paradoxically expects the female health  
382 workers to transgress the very gender norms that created the need for their services in the first  
383 place. A reading of the papers suggests the program designers were aware of women’s gendered  
384 mobility restrictions but chose to ignore the implications of this reality for the female community  
385 health workers. This insensitivity and lack of consideration for the young Lady Health Workers  
386 and Midwives’ safety and respectability discouraged the workers from assisting households  
387 beyond a short walking distance or within their social geography [38,65,66]. The most  
388 vulnerable women remained underserved.

389 Similarly, in Nepal, a food security intervention reproduced gendered inequalities by  
390 erring in assuming female labour was a freely available commodity [67]. The program activities  
391 added to women's existing time-consuming socially ascribed domestic duties. This led to female  
392 time poverty and subsequent selectivity in program participation [67]. The most effective  
393 development strategies were those that relieved gendered labour burdens through services such  
394 as the provision of school lunches [67].

395

### 396 *Hidden costs for the poor*

397 Another crucial structural flaw in program design is the hidden costs required to access the  
398 programs. One such cost is the time needed to travel and fulfill the often-onerous bureaucratic  
399 requirements, which often results in the loss of a full day's wage [53,68]. An evaluation of  
400 India's Targeted Public Distribution System in the sub-district of Sasan found that 64% of  
401 households without ration cards did not even apply out of concern that administrative delays  
402 would interfere with work schedules and subsequent earnings [64]. Given the poor's fragility of  
403 income, these opportunity costs can considerably compound the depths of their poverty -  
404 resulting in a net financial loss rather than a benefit.

405 The assumption that time is trivial for the destitute was also exemplified in the design  
406 flaws within Pakistan's Livelihood Support Cash Grants program [52]. To find out if they had  
407 been accepted as beneficiaries, poverty-stricken victims of a natural disaster were expected to  
408 make regular trips to district offices. If denied, families could only contest their eligibility status  
409 within the first seven days following the publication of recipient lists, which were released on an  
410 unpredictable schedule. Without regular travel to district offices, poor households could miss the

411 opportunity to appeal - likely a contributing factor to the finding that half of the eligible  
412 beneficiaries were not reached by the program [52].

413 Another hidden cost is the solicitation of bribes. An overwhelmingly common  
414 phenomenon within South Asian social protection, corruption is often legitimized under the  
415 guise of registration fees and gratuities [39,46,50,69-71]. Taking the example of Pakistan's Zakat  
416 cash transfers, the monetary value is reduced as beneficiaries highlight multiple hidden  
417 transactional fees from registration officers, peons, and even postmen [57]. In other cases,  
418 applicants were completely unaware that they were paying bribes - believing it to be a requisite  
419 for program participation [49].

420

421 ***Lack of legal documentation and literacy***

422 One common but truly invisible barrier was the poor's exclusion from documentation of their  
423 legal citizenship. Program designs nearly always require such documentation, often an ID card or  
424 birth certificate [50,53,56,57,71]. The poor lack these documents for a range of reasons including  
425 but not limited to the lack of a permanent address [72], lack of knowledge of the importance of  
426 documentation [73], the cost of obtaining documentation [73-75], internal displacement [76], and  
427 generational systemic exclusion due to gender [73,74] or caste [75]. These groups contribute to  
428 the 'Invisible Billion' worldwide who cannot prove their legal identity [74]. In India, the poor's  
429 lack of appropriate documentation meant they could not apply for Below Poverty Line ration  
430 cards, which were needed to prove poverty status when registering for the Chief Minister's  
431 Comprehensive Health Insurance Scheme [53]. Some applicants were also excluded from the  
432 country's Rashtriya Swasthya Bima Yojana health insurance as their presented records did not

433 match those of the company handling enrollment [43]. For Pakistan’s Zakat program, these  
434 requirements created a black market for illegal birth certificates [57].

435 Social protection programs also faltered in accommodating the close relationship between  
436 poverty and low literacy in rural South Asia [46,52]. Program resources were provided in written  
437 format, often in English. The poor’s subsequent inability to absorb the information reified  
438 relationships of dependency on the local elite and government staff [46,52].

439

#### 440 ***Geography of exclusion***

441 Geographic exclusion encompasses social and physical dimensions, an aspect that social  
442 protection programs often overlook in program designs. Despite its seemingly obvious role in  
443 accessibility, eight initiatives failed to consider how the lack of transportation and long distances  
444 to access points might limit uptake by the poor [34,38,43,53,68,71,77]. The program designs of  
445 India’s Targeted Public Distribution System and the Nepal Food Corporation required the  
446 destitute to travel to far, often centrally-located, ration shops at their own expense, incurring high  
447 transaction costs [37,54,63,64]. In Nepal, Gautam & Andersen [37] found that households with  
448 limited mobility resources would spend days walking through harsh terrain to procure their grain  
449 rations. Their travel burden was worsened by the uncertainty of whether or not depots would be  
450 open or even be capable of meeting their quotas. The program design ultimately penalized the  
451 most marginalized, the poor living in remote villages.

452 Social geography’s less obvious (but critical) role was overlooked in the design of  
453 Pakistan’s Lady Health Worker program [65]. Women living in *bhattas* (brick kilns),  
454 encompassing the poorest of the poor populations, were unreached by the program because the  
455 *bhattas* were considered no-go zones and not a part of human settlement. They were,



456 consequently, beyond the borders of the workers' catchment areas [70]. There was also the  
457 perception that it was "demeaning" to enter *bhattas* [70].

458

### 459 **Gateways to Self-Exclusion by the Poor**

460 Our final theme is the poor choosing to self-exclude from participating in social protection  
461 programs. We identified three possible gateways for this process: a desire to maintain dignity, a  
462 lack of capital, and a perception of programs as substandard.

463         The first form of self-exclusion is a desire to maintain a sense of dignity. This is best  
464 described by Axel Honneth [78], who says, "We owe our integrity... to the receipt of approval or  
465 recognition from other persons." Nair [54] introduces the idea of aversion to social protection via  
466 the demonstration effect in which poor households emulate the patterns of the economically  
467 advantaged. This occurred following India's Public Distribution System's transition from a  
468 universal to a targeted program. As Above Poverty Line households were no longer eligible, low  
469 prestige was assigned to those who continued participating in the ration system. Participation  
470 stigma was also evident in India's Mahatma Gandhi National Rural Employment Guarantee  
471 Scheme, in which both tribal and non-tribal families considered the work as below their dignity  
472 [51]. Beneficiaries of Pakistan's Zakat program complained about the demeaning application  
473 process; they felt the government treated them like "beggars" to receive a mere 200 PKR a  
474 month [57]. The gravity of aid-affiliated shame is further demonstrated by a village in northern  
475 Punjab, Pakistan, in which some poor low-caste women actually preferred to remain invisible  
476 and untargeted by social protection to avoid attracting unnecessary attention to their already  
477 disgraced identities [70].

478           The second form of self-exclusion results from the poor lacking the financial, social, and  
479 political capital often required to access the resources ostensibly for them. A poverty-stricken  
480 household's awareness of its externally - and sometimes internally - imposed limitations can  
481 restrict it from even attempting to access social protection programs. This is evident in the poor's  
482 hesitancy to participate in India's Swarnajayanti Gram Swarozgar Yojana microfinance initiative  
483 due to their fear of being unable to repay their loans [61]. Lack of capital also translated into the  
484 sometimes insurmountable challenges of seeking *sunvaiyi* (justice) from government officials  
485 [39]. Although the poor had warranted complaints of elite capture, receipt of justice required  
486 financial input and high social status to ensure that their grievances would not be disregarded.

487           The last gateway to self-exclusion is a consequence of the perception that programs are of  
488 low quality. For example, despite recognizing the benefits of skilled maternal care, Pakistan's  
489 low-caste women continued to seek unskilled birth attendants to avoid experiencing inferior  
490 treatment - mitigating the value of government-funded healthcare [70]. In India's Chief  
491 Minister's Comprehensive Health Insurance Scheme, access to funds took up to 25 days, which  
492 delayed treatment even during emergencies [53]. Poor women instead subjected themselves to  
493 out-of-pocket payments to receive immediate and poor-quality care. Villagers' perceptions of  
494 programs were also guided by bad experiences of seeking care shared within the community,  
495 thus deterring some ideal beneficiaries, and fabricating a form of collective exclusion [68].

496

## 497 **Discussion**

498 While our aim is not to belittle the positive outcomes of social protection, the principal  
499 conclusion of our review of the literature is that the root cause of why programs fail to reach the  
500 poor lie in program designs that are disconnected from on-the-ground realities. This is not a new

501 discovery. Many authors have commented on this disconnect and have highlighted it as the  
502 underlying reason for why programs are not truly transformative [79]. This begs the question,  
503 why does this apathy towards the ground realities of the chronically poor persist?

504 We propose there are three reasons for this. First: there is a lack of understanding of who  
505 precisely the poor are in South Asia. Despite a vast body of literature describing the region's  
506 caste system, it has not been incorporated in national-level definitions of the poor. All criteria for  
507 capturing poverty continue to be determined by western-led definitions [80]. Second: despite the  
508 rhetoric of co-production and end-user engagement [81], there remains a gap in our knowledge  
509 on how to precisely engage with communities at large and especially with poor communities  
510 [82]. Third: the structures and timelines of funding calls do not lend themselves to any  
511 meaningful engagement with poor end-users. Despite requiring engagement with 'local country  
512 stakeholders', donors give 4-6 weeks to develop the program proposals. For example, a recent  
513 multi-million-dollar funding call from Global Affairs Canada, 'Resilient Health Systems for All'  
514 [83], gave 6 weeks for project design, development of relationships with international  
515 stakeholders and write-up. Clearly, there was no time to engage with the primary stakeholders of  
516 these projects, the poor. We suggest that the disconnect between program design and poor's  
517 ground reality is intentional and reflects a broader power dynamic. It represents the global elite's  
518 effort to preserve their dominance, with wealthy donor nations and local elites dictating the lives  
519 of poorer populations based on geopolitical interests [84] and national priorities [85].

520 The review had some limitations. The first essentially reflects the limitations of the  
521 literature. Twenty-seven out of the 42 studies included in our review were quantitative surveys, a  
522 rigid data collection method contingent on the quality of questions and their responses [86].  
523 Quantitative results fail to capture behavioural and emotional attributes from respondents, both

524 valuable measures when evaluating the socially and politically driven accessibility barriers  
525 encountered by the poor [86]. Second, when identifying papers from outside the databases, we  
526 potentially subjected ourselves to the bias of including studies supporting our themes. Third, our  
527 review did not capture data from all South Asian countries as there is a paucity of literature  
528 describing and evaluating social protection programs in Afghanistan and Sri Lanka.

529         Based on this review of the literature, we recommend the traditional approaches to  
530 designing and implementing social protection programs need to be overhauled and decolonized.  
531 This needs to start from the structures of donor funding seeding program ideas, and follow-  
532 through to national governments that carry the programs forward. There is a need to critically  
533 appraise the international consultants and local decision-makers designing these programs in  
534 terms of their contextual understanding and accountability. We also recommend more research to  
535 understand who the truly poor are and how to best engage them in program design. This requires  
536 greater use of qualitative and other innovative research methods. In-depth studies should also be  
537 conducted to sociologically evaluate the influence of the caste system on social protection  
538 programs, especially in the Muslim-dominant countries of Pakistan and Bangladesh [20,87,88].  
539 The research should contextualize how the power dynamics created by this system are at play in  
540 the social, economic, and political spheres and, consequently, must be accounted for in the  
541 design of social protection programs. Lastly, research must be conducted to identify how South  
542 Asian governments can be held accountable to their poor citizens, and effectively absorb the  
543 existing knowledge.

544

545

546

547 **Acknowledgements**

548 The authors thank all researchers involved in the original projects.

549

550 **References**

551 1. Bloch C. Social spending in South Asia— an overview of government expenditure on  
552 health, education and social assistance. Brasília and Katmandu: International Policy  
553 Centre for Inclusive Growth; 2020. 57 p. Report No.:44.

554 2. Mitra A, Paul M. Poverty targeting and economic growth in India. *J Income Wealth*.  
555 2018;40(2):177-89.

556 3. Kharas H, Dooley M. Extreme poverty in the time of COVID-19. Washington (DC):  
557 Center for Sustainable Development at Brookings; 2021 Jun. 11 p.

558 4. Kabeer N. Scoping study on social protection: evidence on impacts and future research  
559 directions. [place unknown]: DFID Research and Evidence; 2009 Dec. 67 p.

560 5. Kabeer N. The politics and practicalities of universalism: towards a citizen-centered  
561 perspective on social protection. *Eur J Dev Res*. 2014 Jul 1;26:338-54.

562 6. OECD Development Centre. (2019). Lessons from the EU-SPS programme:  
563 implementing social protection strategies. Paris (FR): OECD; 2019. 41 p.

564 7. Dreze J, Sen A. Public action for social security: foundations and strategy. In: Ahmed E,  
565 Dreze J, Hills J, Sen A, editors. *Social security in developing countries*. New York (NY):  
566 Oxford University Press; 1991. p. 2-40.

567 8. Guhan S. Social security options for developing countries. In: Figueiredo JB, Shaheed Z,  
568 editors. *Reducing poverty through labour market policies*. Geneva (CH): International  
569 Labour Office; 1994. p. 35-53.

- 570 9. Devereux S, McGregor JA. Transforming social protection: human wellbeing and social  
571 justice. *Eur J Dev Res*. 2014 Jul 1;26(3):296-310.
- 572 10. O'Brien C, Scott Z, Smith G, Barca V, Kardan A, Holmes R, Watson C, Congrave J.  
573 Shock-responsive social protection systems research: synthesis report. Oxford (UK):  
574 Oxford Policy Management; 2018 Jan. 104 p.
- 575 11. Carter B, Roelen K, Enfield S, Avis W. Social protection topic guide. Brighton (UK):  
576 Institute of Development Studies; 2019 Oct. 68 p.
- 577 12. United Nations. Secretary-General's Policy Brief: Investing in jobs and social protection  
578 for poverty eradication and a sustainable recovery. [place unknown]: United Nations;  
579 2021 Sep 28. 28 p.
- 580 13. Gentilini U. Cash transfers in pandemic times: evidence, practices, and implications from  
581 the largest scale up in history. Washington (DC): World Bank; 2022 Jul. 100 p.
- 582 14. De Schutter O. Non-take-up of rights in the context of social protection [Internet]. [place  
583 unknown]: United Nations Human Rights Council; 2022 Apr 19 [cited 2023 Sep 26].  
584 Available from: [https://documents-dds-](https://documents-dds-ny.un.org/doc/UNDOC/GEN/G22/322/17/pdf/G2232217.pdf?OpenElement)  
585 [ny.un.org/doc/UNDOC/GEN/G22/322/17/pdf/G2232217.pdf?OpenElement](https://documents-dds-ny.un.org/doc/UNDOC/GEN/G22/322/17/pdf/G2232217.pdf?OpenElement)
- 586 15. Kidd S, Athias D. Hit and miss: an assessment of targeting effectiveness in social  
587 protection with additional analysis. London (UK): Development Pathways; 2020 Jun. 91  
588 p.
- 589 16. Grosh M, Leite P, Wai-Poi M, Tesliuc E. Revisiting targeting in social assistance: a new  
590 look at old dilemmas. Washington (DC): World Bank; 2022.
- 591 17. Mahmood M. Global debt crisis and South Asia. *The Financial Express* [Internet]. 2022  
592 Aug 13 [cited 2023 Sep 26]. Available from:

- 593 [https://thefinancialexpress.com.bd/views/views/global-debt-crisis-and-south-asia-](https://thefinancialexpress.com.bd/views/views/global-debt-crisis-and-south-asia-1660399998)  
594 [1660399998](https://thefinancialexpress.com.bd/views/views/global-debt-crisis-and-south-asia-1660399998)
- 595 18. Devarajan S, Nabi I. Economic growth in South Asia: promising, unequalising,  
596 sustainable? *Econ Political Wkly*. 2006 Aug 19;41(33):3573-80.
- 597 19. World Bank Group. Climate change action plan 2021-2025: South Asia roadmap.  
598 Washington (DC): World Bank Group; 2021 [cited 2023 April 17]. 146 p. Available  
599 from: <https://openknowledge.worldbank.org/bitstream/handle/10986/36321/164599.pdf>
- 600 20. Basu, K. Why is Bangladesh booming? Brookings [Internet]. 2018 May 1 [cited 2023 Oct  
601 31]. Available from: [https://www.brookings.edu/articles/why-is-bangladesh-](https://www.brookings.edu/articles/why-is-bangladesh-booming/#:~:text=Since%20then%2C%20Bangladesh%27s%20annual%20GDP,reversed%20barring%20gross%20policy%20mismanagement)  
602 [booming/#:~:text=Since%20then%2C%20Bangladesh%27s%20annual%20GDP,reversed](https://www.brookings.edu/articles/why-is-bangladesh-booming/#:~:text=Since%20then%2C%20Bangladesh%27s%20annual%20GDP,reversed%20barring%20gross%20policy%20mismanagement)  
603 [%20barring%20gross%20policy%20mismanagement](https://www.brookings.edu/articles/why-is-bangladesh-booming/#:~:text=Since%20then%2C%20Bangladesh%27s%20annual%20GDP,reversed%20barring%20gross%20policy%20mismanagement)).
- 604 21. Thresia CU, Srinivas PN, Mohindra KS, Jagadeesan CK. The health of Indigenous  
605 populations in South Asia: a critical review in a critical time. *International Journal of*  
606 *Health Services*. 2022 Jan;52(1):61-72.
- 607 22. Bhutta ZA, Mitra A, Salman A, Akbari F, Dalil S, Jehan F, Chowdhury M, Jayasinghe S,  
608 Menon P, Nundy S, Qadri F. Conflict, extremism, resilience and peace in South Asia; can  
609 covid-19 provide a bridge for peace and rapprochement? *BMJ*. 2021 Nov 15;375.
- 610 23. World Economic Forum. Global gender gap report. Geneva (CH): World Economic  
611 Forum; 2023 Jun. 382 p.
- 612 24. Mumtaz Z, Jhangri GS, Bhatti A, Ellison GTH. Caste in Muslim Pakistan: a structural  
613 determinant of inequities in the uptake of maternal health services. *Sex Reprod Health*  
614 *Matters*. 2022;29(2):230-52.

- 615 25. Atlas of Social Protection Indicators of Resilience and Equity [Data set]. World Bank  
616 Group: Washington (DC); 2021 [cited 2023 April 17]. Available from:  
617 <https://databank.worldbank.org/reports.aspx?source=1229#>
- 618 26. Page MJ, McKenzie JE, Bossuyt PM, Boutron I, Hoffmann TC, Mulrow CD et al. The  
619 PRISMA 2020 statement: an updated guideline for reporting systematic reviews. *BMJ*.  
620 2021;372(n71):1-9.
- 621 27. What is GRADE? [Internet]. [place unknown]: GRADE; 2023 [cited 2023 Sep 26].  
622 Available from: <https://www.gradeworkinggroup.org/>
- 623 28. Lewin S, Booth A, Glenton C, Munthe-Kaas H, Rashidian A, Wainwright M, et al.  
624 Applying GRADE-CERQual to qualitative evidence synthesis findings: introduction to  
625 the series. *Implement Sci*. 2018 Jan;13(1):1-10.
- 626 29. Thomas J, Harden A. Methods for the thematic synthesis of qualitative research in  
627 systematic reviews. *BMC Med Res Methodol*. 2008 Dec;8:1-10.
- 628 30. Population, total - India, Pakistan, Bangladesh, Nepal, South Asia [Data set]. World  
629 Bank: Washington (DC); 2021 [cited 2023 April 17]. Available from:  
630 <https://data.worldbank.org/indicator/SP.POP.TOTL?locations=IN-PK-BD-NP-8S>
- 631 31. Davidoff F, Dixon-Woods M, Leviton L, Michie S. Demystifying theory and its use in  
632 improvement. *BMJ Qual Saf*. 2015 Mar 1;24(3):228-38.
- 633 32. Hulme D, Moore K, Seraj KFB. Reaching the people whom microfinance cannot reach:  
634 Learning from BRAC's "Targeting the Ultra Poor" programme. In: Armendariz B, Labie  
635 M, editors. *The handbook of microfinance*. Singapore: World Scientific Publishing Co.  
636 Pte. Ltd.; 2011. p. 563-86.



- 637 33. Misha FA, Raza WA, Ara J, Van de Poel E. How far does a big push really push? Long-  
638 term effects of an asset transfer program on employment trajectories. *Econ Dev Cult*  
639 *Change*. 2019 Oct 1;68(1):41-62.
- 640 34. Walker S, Matin I. Changes in the lives of the ultra poor: an exploratory study. *Dev Pract*.  
641 2006 Feb 1;16(1):80-4.
- 642 35. Asadullah MN, Ara J. Evaluating the long-run impact of an innovative anti-poverty  
643 programme: evidence using household panel data. *Appl Econ*. 2016 Jan 8;48(2):107-20.
- 644 36. Sabates-Wheeler R. Graduation. In: Schüring E, Loewe M, editors. *Handbook on social*  
645 *protection systems*. Cheltenham (UK): Edward Elgar Publishing; 2021. p. 262-75.
- 646 37. Gautam Y, Andersen P. Aid or abyss? Food assistance programs (FAPs), food security  
647 and livelihoods in Humla, Nepal. *Food Secur*. 2017 Apr;9(2):227-38.
- 648 38. Mumtaz Z, Levay A, Bhatti A, Salway S. Good on paper: the gap between programme  
649 theory and real-world context in Pakistan's Community Midwife programme. *BJOG: Int J*  
650 *Obstet Gynaecol*. 2015 Jan;122(2):249–58.
- 651 39. Akerkar S, Joshi PC, Fordham M. Cultures of entitlement and social protection: Evidence  
652 from flood prone Bahraich, Uttar Pradesh, India. *World Dev*. 2016 Oct 1;86:46-58.
- 653 40. Jha R, Bhattacharyya S, Gaiha R, Shankar S. “Capture” of anti-poverty programs: an  
654 analysis of the National Rural Employment Guarantee Program in India. *J Asian Econ*.  
655 2009 Sep 1;20(4):456-64.
- 656 41. Pattenden J. Class and social policy: the National Rural Employment Guarantee Scheme  
657 in Karnataka, India. *J Agrar Change*. 2017 Jan;17(1):43-66.
- 658 42. Roy I. Class coalitions and social protection: the labouring classes and the National Rural  
659 Employment Guarantee Act in Eastern India. *J Dev Stud*. 2021 Jun 3;57(6):863-81.

- 660 43. Sinha RK. Impact of publicly financed health insurance scheme (Rashtriya Swasthya  
661 Bima Yojana) from equity and efficiency perspectives. *Vikalpa*. 2018 Dec;43(4):191-  
662 206.
- 663 44. Galasso E, Ravallion M. Decentralized targeting of an antipoverty program. *J Public*  
664 *Econ*. 2005 Apr 1;89(4):705-27.
- 665 45. Das U. Rationing and accuracy of targeting in India: the case of the Rural Employment  
666 Guarantee Act. *Oxf Dev Stud*. 2015 Jul 3;43(3):361-78.
- 667 46. Das U, Singh A, Mahanto N. Awareness about Mahatma Gandhi National Rural  
668 Employment Guarantee Act: some evidence from the northern parts of West Bengal,  
669 India. *Econ Bull*. 2012;32(1):528-37.
- 670 47. Jha R, Gaiha R, Shankar S, Pandey MK. Targeting accuracy of the NREG: evidence from  
671 Madhya Pradesh and Tamil Nadu. *Eur J Dev Res*. 2013 Dec 1;25(5):758-77.
- 672 48. Pattenden J. Social protection and class relations: evidence from scheduled caste  
673 women's associations in rural South India. *Dev Change*. 2011 Mar;42(2):469-98.
- 674 49. Druza K. Cash transfers in Nepal: Do they contribute to social inclusion? *Oxf Dev Stud*.  
675 2016 Jan 2;44(1):49-69.
- 676 50. Khan GA. A critical analysis of vulnerability in informal sector employment in India:  
677 protective mechanisms and adequacy of protection. *Int Soc Sci J*. 2021 Sep;71(241-  
678 242):197-215.
- 679 51. Nayak S. What motivates to participate in an employment guarantee programme in India?  
680 A logit model analysis. *Econ Bull*. 2012;32(3):2113-27.

- 681 52. Zaidi S, Kamal A, Baig-Ansari N. Targeting vulnerability after the 2005 earthquake:  
682 Pakistan's Livelihood Support Cash Grants programme. *Disasters*. 2010 Apr;34(2):380-  
683 401.
- 684 53. RamPrakash R, Lingam L. Why is women's utilization of a publicly funded health  
685 insurance low? A qualitative study in Tamil Nadu, India. *BMC Public Health*. 2021 Feb  
686 12;21:1-21.
- 687 54. Nair R. Public distribution system in Kerala reassessed. *Indian J Soc Work*. 2011  
688 Jan;72(1):23-54.
- 689 55. Niehaus P, Atanassova A, Bertrand M, Mullainathan S. Targeting with agents. *Am Econ*  
690 *J: Econ Policy*. 2013 Feb 1;5(1):206-38.
- 691 56. Asri V. Targeting of social transfers: are India's poor older people left behind? *World*  
692 *Dev*. 2019 Mar 1;115:46-63.
- 693 57. Kabeer N, Mumtaz K, Sayeed A. Beyond risk management: vulnerability, social  
694 protection and citizenship in Pakistan. *J Int Dev*. 2010 Jan 1;22(1):1-19.
- 695 58. Sajid GM, Arif GM, Yasin HM. Targeting efficiency of cash transfers programmes in  
696 Pakistan. *Pakistan Econ Soc Rev*. 2019 Jul 1;57(1):1-22.
- 697 59. Randive B, San Sebastian M, De Costa A, Lindholm L. Inequalities in institutional  
698 delivery uptake and maternal mortality reduction in the context of cash incentive  
699 program, Janani Suraksha Yojana: results from nine states in India. *Soc Sci Med*. 2014  
700 Dec 1;123:1-6.
- 701 60. Mazumdar S, Sharma AN. Poverty and social protection in urban India: targeting  
702 efficiency and poverty impacts of the Targeted Public Distribution System. *Indian J*  
703 *Labour Econ*. 2013 Oct 1;56(4):547-77.

- 704 61. Mukherjee AK, Kundu A. Swarnajayanti Gram Swarojgar Yojona as a safety net:  
705 evidence from Murshidabad district of West Bengal. *Bangladesh Dev Stud*. 2012 Mar  
706 1;35(1):79-103.
- 707 62. Mishra AK, Kar A. Are targeted unconditional cash transfers effective? Evidence from a  
708 poor region in India. *Soc Indic Res*. 2017 Jan;130(2):819-43.
- 709 63. Jha R, Gaiha R, Pandey MK, Kaicker N. Food subsidy, income transfer and the poor: a  
710 comparative analysis of the public distribution system in India's states. *J Policy Model*.  
711 2013 Nov 1;35(6):887-908.
- 712 64. Kannan KP, Pillai NV. Food security at the local level: a study in contrast between  
713 Kerala and Orissa in India. In: Cook S, Kabeer N, editors. *Social protection as*  
714 *development policy: Asian perspectives*. New Dehli (IN): Routledge; 2010. p. 245-277.
- 715 65. Mumtaz Z, Salway S, Nykiforuk C, Bhatti A, Atallahjan A, Ayyalasomayajula B. The  
716 role of social geography on Lady Health Workers' mobility and effectiveness in Pakistan.  
717 *Soc Sci Med*. 2013 Aug 1;91:48–57.
- 718 66. Mumtaz Z, Salway S. 'I never go anywhere': extricating the links between women's  
719 mobility and uptake of reproductive health services in Pakistan. *Soc Sci Med*. 2005 Apr  
720 1;60(8):1751-65.
- 721 67. Nichols CE. Time Ni Hota Hai: time poverty and food security in the Kumaon hills,  
722 India. *Gend Place Cult*. 2016 Oct 2;23(10):1404-19.
- 723 68. Bechange S, Schmidt E, Ruddock A, Khan IK, Gillani M, Roca A, et al. Understanding  
724 the role of lady health workers in improving access to eye health services in rural  
725 Pakistan—findings from a qualitative study. *Arch Public Health*. 2021 Dec;79(1):1-12.

- 726 69. Gaiha R, Imai K, Kaushik PD. On the targeting and cost-effectiveness of anti-poverty  
727 programmes in rural India. *Dev Change*. 2001 Mar;32(2):309-42.
- 728 70. Mumtaz Z, Salway S, Bhatti A, Shanner L, Zaman S, Laing L, et al. Improving maternal  
729 health in Pakistan: toward a deeper understanding of the social determinants of poor  
730 women's access to maternal health services. *Am J Public Health*. 2014 Feb;104(S1):S17-  
731 24.
- 732 71. Patel P, Das M, Das U. The perceptions, health-seeking behaviours and access of  
733 scheduled caste women to maternal health services in Bihar, India. *Reprod Health*  
734 *Matters*. 2018 Nov 8;26(54):114-25.
- 735 72. Chandran R, Sharma S. Indian children without Aadhaar digital ID shut out of school  
736 [Internet]. [place unknown]: Context News; 2022 Jul 28 [cited 2023 Oct 31]. Available  
737 from: [https://www.context.news/digital-divides/indian-children-without-aadhaar-digital-](https://www.context.news/digital-divides/indian-children-without-aadhaar-digital-id-shut-out-of-school)  
738 [id-shut-out-of-school](https://www.context.news/digital-divides/indian-children-without-aadhaar-digital-id-shut-out-of-school)
- 739 73. Livani T, Haddock S. Women's access to identification cards can accelerate development  
740 in Afghanistan [Internet]. [place unknown]: World Bank Blogs; 2020 Oct 5 [cited 2023  
741 Oct 31]. Available from: [https://blogs.worldbank.org/endpovertyinsouthasia/womens-](https://blogs.worldbank.org/endpovertyinsouthasia/womens-access-identification-cards-can-accelerate-development-afghanistan)  
742 [access-identification-cards-can-accelerate-development-afghanistan](https://blogs.worldbank.org/endpovertyinsouthasia/womens-access-identification-cards-can-accelerate-development-afghanistan)
- 743 74. Desai VT, Diofasi A, Lu J. The global identification challenge: Who are the 1 billion  
744 people without proof of identity? [Internet]. [place unknown]: World Bank Blogs; 2018  
745 Apr 25 [cited 2023 Oct 31]. Available from: [https://blogs.worldbank.org/voices/global-](https://blogs.worldbank.org/voices/global-identification-challenge-who-are-1-billion-people-without-proof-identity)  
746 [identification-challenge-who-are-1-billion-people-without-proof-identity](https://blogs.worldbank.org/voices/global-identification-challenge-who-are-1-billion-people-without-proof-identity)
- 747 75. Sur P. Under India's caste system, Dalits are considered untouchable. The coronavirus is  
748 intensifying that slur [Internet]. [place unknown]: CNN; 2020 Apr 16 [cited 2023 Oct

- 749 31]. Available from: [https://www.cnn.com/2020/04/15/asia/india-coronavirus-lower-](https://www.cnn.com/2020/04/15/asia/india-coronavirus-lower-castes-hnk-intl/index.html)  
750 [castes-hnk-intl/index.html](https://www.cnn.com/2020/04/15/asia/india-coronavirus-lower-castes-hnk-intl/index.html)
- 751 76. Nayar R, Gottret P, Mitra P, Betcherman G, Lee YM, Santos I, Dahal M, Shrestha M.  
752 More and Better Jobs in South Asia. Washington (DC): World Bank; 2012.
- 753 77. Hasan MZ, Ahmed MW, Mehdi GG, Khan JA, Islam Z, Chowdhury ME, et al. Factors  
754 affecting the healthcare utilization from Shasthyo Suroksha Karmasuchi scheme among  
755 the below-poverty-line population in one subdistrict in Bangladesh: a cross sectional  
756 study. BMC Health Serv Res. 2022 Jul 8;22(1):885.
- 757 78. Honneth A. Integrity and disrespect: Principles of a conception of morality based on the  
758 theory of recognition. Polit Theory. 1992 May;20(2):187-201.
- 759 79. Koehler G. Transformative social protection: reflections on South Asian policy  
760 experiences. IDS Bulletin. 2011 Nov;42(6):96-103.
- 761 80. Key Indicators Database [Internet]. [place unknown]: Asian Development Bank; 2023  
762 [cited 2023 Nov 13]. Available from: <https://kidb.adb.org/>
- 763 81. Parnini S. Poverty and governance in South Asia. New York (NY): Routledge; 2014 Nov  
764 20.
- 765 82. Bynner C, Terje A. Knowledge mobilisation in public service reform: integrating  
766 empirical, technical and practical wisdom. Evid Policy. 2021;17(1):75-91.
- 767 83. Global Affairs Canada. Resilient health systems for all - concept notes [Internet]. Canada:  
768 Government of Canada; 2023 Jun 29 [cited 2023 Nov 7]. Available from:  
769 [https://www.international.gc.ca/world-monde/funding-financement/resilient\\_health-](https://www.international.gc.ca/world-monde/funding-financement/resilient_health-systemes_sante.aspx?lang=eng)  
770 [systemes\\_sante.aspx?lang=eng](https://www.international.gc.ca/world-monde/funding-financement/resilient_health-systemes_sante.aspx?lang=eng)

- 771 84. Pearse W. The problems with development aid [Internet]. [place unknown]: Inomics;  
772 2021 Apr 7 [cited 2023 Nov 7]. Available from: [https://inomics.com/blog/the-problems-](https://inomics.com/blog/the-problems-with-development-aid-1388062)  
773 [with-development-aid-1388062](https://inomics.com/blog/the-problems-with-development-aid-1388062)
- 774 85. Sridhar D. Seven challenges in international development assistance for health and ways  
775 forward. *J Law Med Ethics*. 2010;38(3):459-69.
- 776 86. Queirós A, Faria D, Almeida F. Strengths and limitations of qualitative and quantitative  
777 research methods. *Eur J Educ Stud*. 2017 Sep 7;3(9):369-87.
- 778 87. Rao J. The caste system: effects on poverty in India, Nepal and Sri Lanka. *Global*  
779 *Majority E-Journal*. 2010 Dec;1(2):97-106.
- 780 88. Tamim T, Tariq H. The intersection of caste, social exclusion and educational  
781 opportunity in rural Punjab. *Int J Educ Dev*. 2015 Jul 1;43:51-62.
- 782 89. Imai KS, Sato T. Decentralization, democracy and allocation of poverty alleviation  
783 programmes in rural India. *Eur J Dev Res*. 2012 Feb 1;24(1):125-43.
- 784 90. Jha R, Bhattacharyya S, Gaiha R. Temporal variation of capture of anti-poverty  
785 programs: rural public works and food for work programs in rural India. *Int Rev Appl*  
786 *Econ*. 2011 May 1;25(3):349-62.
- 787 91. Murgai R, Zaidi S. Effectiveness of food assistance programs in Bangladesh. *J Dev Soc*.  
788 2005 Jun;21(1-2):121-42.
- 789 92. Nandi A, Ashok A, Laxminarayan R. The socioeconomic and institutional determinants  
790 of participation in India's health insurance scheme for the poor. *PLoS One*. 2013 Jun  
791 21;8(6):e66296.

- 792 93. Ahmed AU, Del Ninno C. The food for education program in Bangladesh: An evaluation  
793 of its impact on educational attainment and food security. Washington (DC):  
794 International Food Policy Research Institute; 2002 Sep. 85 p.
- 795 94. National Social Assistance Programme. About us: enhancement of pension amount under  
796 IGNOAPS in 2011 [Internet]. India: Ministry of Rural Development; [cited 2023 Sep 26].  
797 Available from: <https://nsap.nic.in/circular.do?method=aboutus>
- 798 95. Cheema I, Farhat M, Binci M, Asmat R, Javeed S, O’Leary S. Benazir Income Support  
799 Programme: evaluation report [Internet]. Pakistan: Government of Pakistan; 2020 [cited  
800 2023 April 17]. Available from:  
801 [https://bisp.gov.pk/SiteImage/Misc/files/BISP\\_EvaluationReport\\_Ver%20without\\_FINA](https://bisp.gov.pk/SiteImage/Misc/files/BISP_EvaluationReport_Ver%20without_FINA)  
802 [L.pdf](#)
- 803 96. Naqvi SM, Sabir HM, Shamim A, Tariq M. Social safety nets and poverty in Pakistan (a  
804 case study of BISP in Tehsil Mankera district Bhakkar). J Financ Econ. 2014;2(2):44-9.
- 805 97. Saeed S, Iqbal J. Challenges and issues in design and implementation: ERRA’s  
806 Livelihood Support Cash Grant Programme for vulnerable communities. Pakistan:  
807 Earthquake Reconstruction & Rehabilitation Authority; 2010. 16 p.



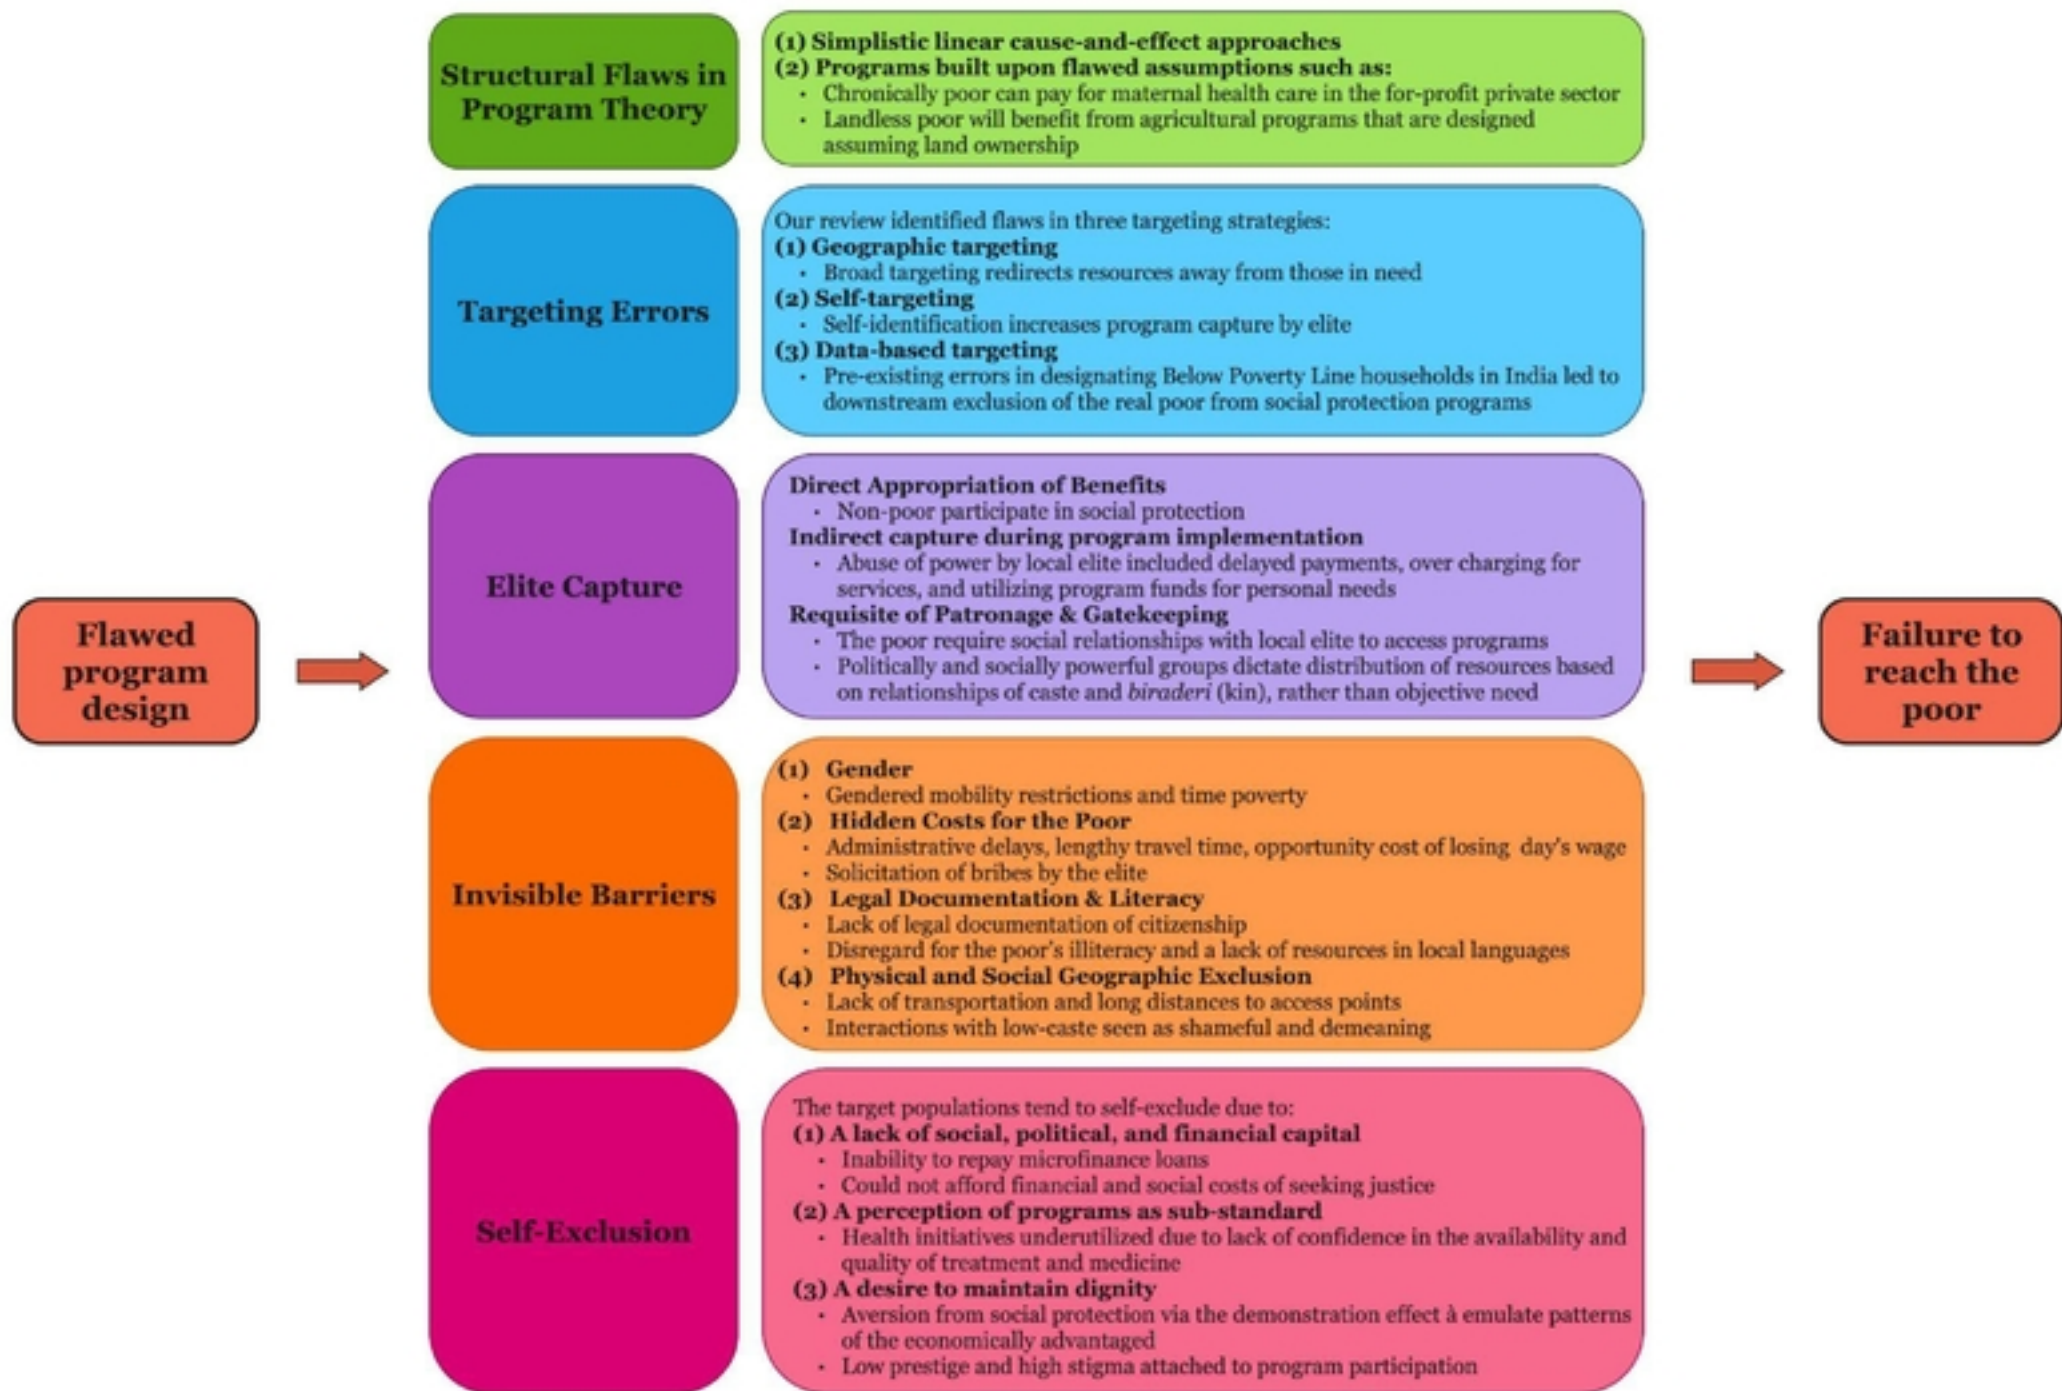

Figure 2
